# Supplementary material for: Heroin-Related Fatalities in Jeddah, Saudi Arabia, between 2008 and 2018
Source: MDPI journal article supplement (doi:10.3390/toxics11030248), 2023-03-06
Supplement: s1 [file s1]

**Table S1.** Summary of method validation parameters for the analysis of heroin biomarkers and their metabolites in blood, urine, vitreous humor and bile.

| Bodily fluid specimens    |                           |                            |          |       |       |       |       |       |       |                |       |       |       |       |       |       |       |     |
|---------------------------|---------------------------|----------------------------|----------|-------|-------|-------|-------|-------|-------|----------------|-------|-------|-------|-------|-------|-------|-------|-----|
|                           |                           |                            |          |       |       |       |       |       |       |                |       |       |       |       |       |       |       |     |
|                           |                           | Blood with sodium fluoride |          |       |       | Urine |       |       |       | Vitreous humor |       |       |       | Bile  |       |       |       |     |
| Analytes <sup>&amp;</sup> |                           | 6-MAM                      | 6-AC     | MOR   | COD   | 6-MAM | 6-AC  | MOR   | COD   | 6-MAM          | 6-AC  | MOR   | COD   | 6-MAM | 6-AC  | MOR   | COD   |     |
| LOD                       |                           | 0.4                        | 0.2      | 0.2   | 0.2   | 0.2   | 0.2   | 0.3   | 0.3   | 0.2            | 0.3   | 0.2   | 0.2   | 0.3   | 0.3   | 0.4   | 0.3   |     |
| LLOQ                      |                           | Mean (ng/g)                | 1        | 1     | 1     | 1     | 1     | 1     | 1     | 1              | 1     | 1     | 1     | 1     | 1     | 1     | 1     |     |
|                           |                           | %E <sup>e</sup>            | -2       | 4     | 1     | 2     | 5     | -3    | 2     | -5             | -2    | -6    | -2    | -2    | -3    | -2    | -1    |     |
|                           |                           | Within-run %CV**           | 9        | 5     | 5     | 6     | 6     | 9     | 3     | 11             | 4     | 10    | 5     | 10    | 13    | 8     | 12    |     |
|                           |                           | Between-run %CV            | 8        | 4     | 6     | 7     | 5     | 8     | 4     | 10             | 5     | 8     | 7     | 8     | 11    | 10    | 9     |     |
| LDR <sup>φ</sup>          |                           | ng/mL                      | 0.5-1000 |       |       |       |       |       |       |                |       |       |       |       |       |       |       |     |
| R2 *                      |                           |                            | 0.999    | 0.999 | 0.999 | 0.999 | 0.999 | 0.999 | 0.999 | 0.999          | 0.999 | 0.999 | 0.999 | 0.999 | 0.999 | 0.999 | 0.999 |     |
| Accuracy and precision    | Low control (5 ng/g)      | Mean (ng/g)                | 5.0      | 4.9   | 4.9   | 4.9   | 4.9   | 5.0   | 5.0   | 4.8            | 4.9   | 4.9   | 4.8   | 4.8   | 5.0   | 5     | 5.2   | 5.2 |
|                           |                           | %E <sup>ϕ</sup>            | -1       | -3    | -2    | -2    | -3    | -1    | -2    | -4             | -3    | -2    | -5    | -3    | 1     | 3     | 5     | 3   |
|                           |                           | Within-run %CV**           | 14       | 11    | 9     | 7     | 11    | 13    | 6     | 10             | 11    | 12    | 10    | 8     | 10    | 14    | 13    | 11  |
|                           |                           | Between-run %CV            | 13       | 12    | 10    | 4     | 11    | 10    | 7     | 12             | 10    | 8     | 9     | 7     | 11    | 9     | 11    | 12  |
|                           | Medium Control (100 ng/g) | Mean (ng/g)                | 98       | 98    | 102   | 97    | 98    | 101   | 99    | 98             | 99    | 102   | 99    | 99    | 103   | 102   | 102   | 95  |
|                           |                           | %E                         | -2       | -2    | 2     | -3    | -2    | 1     | -1    | -2             | -1    | 2     | -1    | -1    | 3     | 2     | 2     | -5  |
|                           |                           | Within Run %CV             | 6        | 6     | 5     | 4     | 6     | 8     | 4     | 4              | 5     | 8     | 4     | 3     | 7     | 4     | 2     | 3   |
|                           |                           | Between Run %CV            | 9        | 8     | 8     | 2     | 7     | 4     | 6     | 6              | 2     | 8     | 8     | 4     | 9     | 7     | 7     | 5   |
|                           | High control (800 ng/g)   | Mean (ng/g)                | 784      | 788   | 810   | 791   | 779   | 786   | 789   | 788            | 793   | 788   | 778   | 812   | 784   | 777   | 793   | 796 |
|                           |                           | %E                         | -2       | -1    | 1     | -1    | -3    | -2    | -1    | -2             | -1    | -1    | -3    | 2     |       | -3    | -1    | -1  |

|                       |                |                    |     |     |     |     |     |    |     |     |     |    |     |     |      |      |      |      |
|-----------------------|----------------|--------------------|-----|-----|-----|-----|-----|----|-----|-----|-----|----|-----|-----|------|------|------|------|
| Dilution              | 100<br>ng/g Ψ  | Within Run<br>%CV  | 4   | 2   | 4   | 2   | 3   | 2  | 2   | 2   | 2   | 3  | 2   | 4   | -2   | 2    | 2    | 3    |
|                       |                | Between Run<br>%CV | 3   | 3   | 4   | 2   | 1   | 2  | 2   | 3   | 3   | 4  | 2   | 1   | 2    | 2    | 3    | 1    |
|                       |                | Mean (ng/mL)       | 9.9 | 9.5 | 9.6 | 9.9 | 9.8 | 10 | 9.7 | 9.5 | 9.7 | 10 | 9.6 | 9.7 | 10.2 | 10.1 | 10.2 | 10.1 |
|                       |                | %E                 | -1  | -5  | -4  | -1  | -2  | -1 | -3  | -5  | -3  | 1  | -4  | -3  | 2    | 1    | 2    | 1    |
|                       |                | Within-run<br>%CV  | 7   | 9   | 3   | 5   | 10  | 6  | 6   | 4   | 12  | 13 | 5   | 6   | 8    | 5    | 5    | 6    |
|                       |                | Between-run<br>%CV | 6   | 8   | 4   | 4   | 9   | 5  | 6   | 4   | 8   | 7  | 4   | 5   | 8    | 6    | 7    | 5    |
|                       | 7500<br>ng/g ¥ | Mean (ng/mL)       | 76  | 79  | 78  | 74  | 76  | 78 | 76  | 77  | 79  | 79 | 77  | 74  | 78   | 76   | 78   | 79   |
|                       |                | %E                 | 1   | 5   | 4   | -1  | 1   | 4  | 1   | 2   | -1  | 6  | 2   | -1  | -2   | 2    | 4    | 6    |
|                       |                | Within-run<br>%CV  | 5   | 2   | 6   | 6   | 7   | 5  | 7   | 8   | 2   | 5  | 4   | 7   | 2    | 3    | 2    | 3    |
|                       |                | Between-run<br>%CV | 4   | 3   | 5   | 9   | 5   | 4  | 4   | 7   | 3   | 8  | 3   | 7   | 3    | 1    | 3    | 1    |
| Matrix<br>effects     | 5 ng/mL        | Mean (%)           | 3   | -2  | 18  | 8   | 9   | -3 | -12 | 5   | -4  | 8  | 14  | 3   | 7    | 13   | 14   | 13   |
|                       |                | %CV                | 5   | 3   | 3   | 5   | 3   | 2  | 4   | 1   | 5   | 4  | 1   | 1   | 6    | 3    | 5    | 3    |
| Recovery              |                | Mean (%)           | 92  | 95  | 86  | 92  | 90  | 89 | 99  | 99  | 86  | 89 | 98  | 99  | 91   | 87   | 95   | 92   |
|                       |                | %CV                | 4   | 1   | 4   | 7   | 2   | 2  | 5   | 8   | 7   | 10 | 6   | 2   | 6    | 4    | 4    | 2    |
| Matrix<br>effects (%) | 100<br>ng/mL   | Mean (%)           | 7   | 10  | 19  | 2   | 1   | 8  | -13 | -1  | -7  | 6  | 7   | 2   | 4    | 5    | 20   | 2    |
|                       |                | %CV                | 5   | 6   | 7   | 5   | 6   | 4  | 7   | 1   | 4   | 3  | 6   | 4   | 5    | 2    | 4    | 5    |
| Recovery<br>(%)       |                | Mean (%)           | 98  | 96  | 98  | 94  | 97  | 98 | 99  | 93  | 94  | 95 | 95  | 98  | 95   | 97   | 97   | 97   |
|                       |                | %CV                | 7   | 7   | 6   | 7   | 6   | 7  | 6   | 8   | 5   | 8  | 5   | 3   | 6    | 5    | 5    | 7    |
| Matrix<br>effects (%) | 800<br>ng/mL   | Mean (%)           | 7   | 10  | 19  | 2   | 1   | 8  | -13 | -1  | -7  | 6  | 7   | 2   | 4    | 5    | 20   | 2    |
|                       |                | %CV                | 5   | 6   | 7   | 5   | 6   | 4  | 7   | 1   | 4   | 3  | 6   | 4   | 5    | 2    | 4    | 5    |
| Recovery<br>(%)       |                | Mean (%)           | 98  | 96  | 98  | 94  | 97  | 98 | 99  | 93  | 94  | 95 | 95  | 98  | 95   | 97   | 97   | 97   |

|                                      |          |          |     |     |     |     |     |     |     |     |     |     |     |     |     |     |     |     |
|--------------------------------------|----------|----------|-----|-----|-----|-----|-----|-----|-----|-----|-----|-----|-----|-----|-----|-----|-----|-----|
|                                      |          | %CV      | 7   | 7   | 6   | 7   | 6   | 7   | 6   | 8   | 5   | 8   | 5   | 3   | 6   | 5   | 5   | 7   |
| Autosampler Stability<br>(5 ng/mL)   | 24 h     | Mean (%) | 99  | 98  | 97  | 98  | 100 | 100 | 99  | 100 | 97  | 95  | 98  | 99  | 96  | 99  | 101 | 101 |
|                                      |          | %CV      | 10  | 5   | 9   | 7   | 4   | 6   | 7   | 3   | 8   | 4   | 11  | 5   | 6   | 11  | 5   | 12  |
|                                      | 48 h     | Mean (%) | 99  | 97  | 98  | 100 | 99  | 99  | 97  | 102 | 98  | 98  | 98  | 99  | 98  | 97  | 104 | 103 |
|                                      |          | %CV      | 8   | 3   | 7   | 6   | 5   | 4   | 6   | 2   | 3   | 5   | 7   | 6   | 9   | 3   | 4   | 11  |
|                                      | One week | Mean (%) | 98  | 94  | 101 | 101 | 99  | 98  | 98  | 101 | 99  | 96  | 100 | 100 | 98  | 96  | 102 | 104 |
|                                      |          | %CV      | 6   | 3   | 5   | 11  | 9   | 7   | 6   | 5   | 11  | 8   | 9   | 12  | 10  | 12  | 8   | 3   |
| Autosampler Stability<br>(100 ng/mL) | 24 h     | Mean (%) | 100 | 98  | 100 | 103 | 98  | 98  | 100 | 100 | 100 | 99  | 99  | 100 | 99  | 98  | 100 | 102 |
|                                      |          | %CV      | 8   | 4   | 7   | 3   | 5   | 6   | 5   | 4   | 3   | 2   | 4   | 5   | 2   | 4   | 3   | 3   |
|                                      | 48 h     | Mean (%) | 98  | 96  | 102 | 105 | 97  | 97  | 101 | 103 | 99  | 98  | 100 | 101 | 99  | 98  | 101 | 105 |
|                                      |          | %CV      | 4   | 3   | 5   | 6   | 5   | 3   | 6   | 4   | 2   | 5   | 3   | 2   | 4   | 3   | 7   | 2   |
|                                      | One week | Mean (%) | 97  | 96  | 103 | 104 | 96  | 97  | 102 | 104 | 98  | 97  | 101 | 101 | 98  | 97  | 101 | 101 |
|                                      |          | %CV      | 4   | 3   | 7   | 4   | 3   | 2   | 4   | 6   | 4   | 6   | 3   | 2   | 4   | 2   | 5   | 1   |
| Autosampler Stability<br>(800 ng/mL) | 24 h     | Mean (%) | 100 | 100 | 100 | 101 | 100 | 100 | 100 | 100 | 100 | 100 | 100 | 100 | 100 | 100 | 100 | 100 |
|                                      |          | %CV      | 2   | 3   | 1   | 1   | 2   | 1   | 2   | 2   | 3   | 2   | 1   | 1   | 2   | 1   | 1   | 3   |
|                                      | 48 h     | Mean (%) | 99  | 99  | 101 | 100 | 99  | 100 | 99  | 100 | 100 | 100 | 100 | 101 | 99  | 99  | 100 | 101 |
|                                      |          | %CV      | 2   | 1   | 1   | 2   | 2   | 2   | 2   | 1   | 4   | 1   | 2   | 1   | 3   | 1   | 2   | 2   |
|                                      | One week | Mean (%) | 99  | 98  | 100 | 100 | 99  | 99  | 99  | 100 | 100 | 100 | 100 | 101 | 99  | 99  | 100 | 101 |
|                                      |          | %CV      | 1   | 3   | 1   | 2   | 2   | 3   | 2   | 1   | 4   | 1   | 2   | 1   | 3   | 1   | 2   | 2   |

<sup>&</sup> Analytes: 6-monoacetylmorphine (6-MAM), 6-acetylcodeine (6-AC); MOR: morphine; COD: codeine ; \* R<sup>2</sup>: Coefficient of determination; Φ LDR: Linear dynamic range; \*\*CV: coefficient of variation; † %E: Relative error. ‡ Dilution factor: 1:10 times; § Dilution factor: 1:100 times; # %: percentage comparing to targeted concentration.

**Table S2.** Year distribution of 6-monoacetylmorphine, 6-acetylcodeine, morphine, and codeine in the 97 heroin-related deaths cases reported in Jeddah, Saudi Arabia between 2008–2018.

| Year | Total <i>N</i> <sup>#</sup> |          | Blood with sodium fluoride |      |          |         | Urine |      |          |         | Vitreous humor |      |          |         | Bile  |      |          |         |
|------|-----------------------------|----------|----------------------------|------|----------|---------|-------|------|----------|---------|----------------|------|----------|---------|-------|------|----------|---------|
|      |                             |          | 6-MAM                      | 6-AC | Morphine | Codeine | 6-MAM | 6-AC | Morphine | Codeine | 6-MAM          | 6-AC | Morphine | Codeine | 6-MAM | 6-AC | Morphine | Codeine |
| 2008 | 4                           | <i>N</i> | 4                          | 0    | 4        | 4       | 3     | 3    | 3        | 3       | 2              | 1    | 2        | 2       | 1     | 0    | 1        | 1       |
|      |                             | Median   | 7                          | .    | 141      | 12      | 87    | 12   | 213      | 279     | 37             | 2    | 121      | 6       | 1     | .    | 121      | 7       |
|      |                             | Minimum  | 1.3                        | .    | 104.0    | 7.0     | 42.0  | 1.2  | 186.0    | 71.0    | 1.3            | 1.8  | 120.0    | 5.0     | 1.3   | .    | 121.0    | 7.0     |
|      |                             | Maximum  | 14                         | .    | 219      | 20      | 426   | 13   | 9279     | 602     | 72             | 2    | 121      | 7       | 1     | .    | 121      | 7       |
| 2009 | 10                          | <i>N</i> | 2                          | 0    | 8        | 8       | 6     | 3    | 6        | 6       | 8              | 5    | 9        | 9       | 2     | 1    | 2        | 2       |
|      |                             | Median   | 2                          | .    | 215      | 9       | 26    | 3    | 1515     | 103     | 13             | 1    | 123      | 13      | 12    | 1    | 4575     | 40      |
|      |                             | Minimum  | 1.2                        | .    | 23.0     | 4.0     | 1.0   | 2.0  | 122.0    | 5.0     | 1.0            | Tr*  | 11.0     | 2.0     | 12.0  | 1.0  | 1350.0   | 12.0    |
|      |                             | Maximum  | 2                          | .    | 314      | 56      | 670   | 69   | 11700    | 660     | 33             | 8    | 270      | 72      | 12    | 1    | 7800     | 67      |
| 2010 | 9                           | <i>N</i> | 4                          | 1    | 5        | 5       | 7     | 3    | 7        | 6       | 7              | 2    | 7        | 5       | 0     | 0    | 2        | 2       |
|      |                             | Median   | 11                         | 2    | 290      | 33      | 471   | 320  | 6338     | 417     | 14             | 12   | 63       | 12      | .     | .    | 41091    | 165     |
|      |                             | Minimum  | 4.0                        | 1.6  | 75.0     | 3.0     | 228.0 | 87.0 | 242.0    | 100.0   | 6.0            | 1.0  | 17.0     | 3.0     | .     | .    | 41081.0  | 165.0   |
|      |                             | Maximum  | 23                         | 2    | 420      | 65      | 4557  | 709  | 20424    | 972     | 125            | 23   | 254      | 39      | .     | .    | 41100    | 165     |
| 2011 | 10                          | <i>N</i> | 8                          | 3    | 9        | 9       | 5     | 1    | 5        | 5       | 6              | 3    | 6        | 6       | 0     | 0    | 0        | 0       |
|      |                             | Median   | 21                         | 6    | 290      | 45      | 130   | 56   | 3836     | 300     | 116            | 4    | 77       | 24      | .     | .    | .        | .       |
|      |                             | Minimum  | 1.0                        | 5.0  | 121.0    | 11.0    | 5.0   | 56.0 | 14.0     | 8.0     | 25.0           | 3.0  | 8.0      | 8.0     | .     | .    | .        | .       |
|      |                             | Maximum  | 153                        | 11   | 827      | 76      | 2778  | 56   | 6933     | 904     | 196            | 8    | 891      | 143     | .     | .    | .        | .       |
| 2012 | 7                           | <i>N</i> | 5                          | 3    | 7        | 7       | 6     | 5    | 6        | 6       | 4              | 2    | 4        | 4       | 0     | 0    | 1        | 1       |
|      |                             | Median   | 21                         | 4    | 470      | 42      | 401   | 35   | 3312     | 252     | 49             | 1    | 117      | 21      | .     | .    | 133      | 14      |
|      |                             | Minimum  | 6.0                        | 1.0  | 278.0    | 5.0     | 14.0  | 11.0 | 102.0    | 23.0    | 18.0           | Tr   | 44.0     | 11.0    | .     | .    | 133.0    | 14.0    |
|      |                             | Maximum  | 251                        | 19   | 683      | 76      | 2778  | 55   | 7498     | 1303    | 140            | 1    | 244      | 76      | .     | .    | 133      | 14      |
| 2013 | 6                           | <i>N</i> | 3                          | 1    | 5        | 5       | 6     | 4    | 6        | 6       | 5              | 4    | 5        | 5       | 2     | 0    | 2        | 2       |
|      |                             | Median   | 8                          | 1    | 340      | 28      | 345   | 13   | 1826     | 124     | 25             | 1    | 160      | 17      | 26    | .    | 1405     | 31      |
|      |                             | Minimum  | 5.0                        | 1.3  | 105.0    | 4.0     | 65.0  | 3.0  | 720.0    | 6.0     | 10.0           | .5   | 37.0     | 9.0     | 14.0  | .    | 459.0    | 24.0    |
|      |                             | Maximum  | 10                         | 1    | 439      | 79      | 2708  | 34   | 15953    | 1130    | 45             | 2    | 255      | 25      | 38    | .    | 2350     | 37      |
| 2014 | 7                           | <i>N</i> | 5                          | 2    | 7        | 7       | 6     | 3    | 6        | 6       | 6              | 4    | 6        | 6       | 1     | 0    | 3        | 3       |

|      |    |          |      |      |       |      |       |      |       |       |      |     |      |     |       |     |        |      |
|------|----|----------|------|------|-------|------|-------|------|-------|-------|------|-----|------|-----|-------|-----|--------|------|
|      |    | Median   | 10   | 22   | 369   | 41   | 107   | 41   | 1072  | 87    | 94   | 5   | 110  | 15  | 10    | .   | 1264   | 23   |
|      |    | Minimum  | 3.0  | 14.0 | 108.0 | 18.0 | 10.0  | 5.0  | 96.0  | 5.0   | 21.0 | .6  | 39.0 | 9.0 | 10.0  | .   | 494.0  | 5.0  |
|      |    | Maximum  | 416  | 29   | 4387  | 140  | 2391  | 135  | 50401 | 1593  | 243  | 13  | 545  | 124 | 10    | .   | 9808   | 79   |
|      |    |          |      |      |       |      |       |      |       |       |      |     |      |     |       |     |        |      |
| 2015 | 8  | <i>N</i> | 4    | 1    | 8     | 8    | 6     | 4    | 6     | 6     | 3    | 1   | 3    | 3   | 1     | 1   | 1      | 1    |
|      |    | Median   | 10   | 4    | 354   | 32   | 99    | 21   | 377   | 34    | 64   | 3   | 148  | 18  | 9     | 1   | 412    | 37   |
|      |    | Minimum  | 6.0  | 4.0  | 190.0 | 18.0 | 1.3   | 1.0  | 184.0 | 12.0  | 26.0 | 3.0 | 17.0 | 4.0 | 9.0   | .9  | 412.0  | 37.0 |
|      |    | Maximum  | 266  | 4    | 1927  | 63   | 18876 | 670  | 42264 | 12110 | 70   | 3   | 390  | 27  | 9     | 1   | 412    | 37   |
| 2016 | 12 | <i>N</i> | 4    | 2    | 11    | 11   | 7     | 4    | 7     | 7     | 10   | 3   | 10   | 10  | 1     | 0   | 3      | 2    |
|      |    | Median   | 15   | 2    | 250   | 18   | 1315  | 341  | 848   | 54    | 28   | 2   | 71   | 22  | 160   | .   | 5980   | 98   |
|      |    | Minimum  | 10.0 | Tr   | 119.0 | 7.0  | 48.0  | 39.0 | 86.0  | 7.0   | 14.0 | 2.0 | 17.0 | 3.0 | 160.0 | .   | 1715.0 | 6.5  |
|      |    | Maximum  | 104  | 5    | 715   | 67   | 3390  | 641  | 12247 | 903   | 212  | 13  | 201  | 31  | 160   | .   | 40383  | 189  |
| 2017 | 9  | <i>N</i> | 4    | 1    | 8     | 8    | 7     | 6    | 7     | 7     | 7    | 4   | 7    | 7   | 4     | 2   | 5      | 4    |
|      |    | Median   | 6    | 1    | 222   | 10   | 520   | 96   | 1325  | 102   | 22   | 8   | 42   | 9   | 8     | 5   | 1509   | 29   |
|      |    | Minimum  | .7   | 1.0  | 112.0 | 3.0  | 91.0  | 8.0  | 524.0 | 31.0  | 3.4  | .4  | 13.0 | 3.0 | 2.0   | 5.0 | 40.0   | 13.0 |
|      |    | Maximum  | 23   | 1    | 514   | 54   | 1584  | 201  | 4114  | 555   | 65   | 15  | 260  | 14  | 14    | 5   | 2577   | 66   |
| 2018 | 15 | <i>N</i> | 7    | 6    | 12    | 12   | 15    | 14   | 15    | 12    | 12   | 6   | 12   | 12  | 5     | 4   | 8      | 7    |
|      |    | Median   | 12   | 2    | 233   | 16   | 358   | 19   | 625   | 195   | 18   | 3   | 92   | 9   | 13    | 4   | 3366   | 36   |
|      |    | Minimum  | .3   | .2   | 122.0 | 3.0  | 1.0   | 1.0  | 23.0  | 3.0   | 3.0  | Tr  | 8.0  | 1.4 | 2.0   | 1.3 | 300.0  | 6.0  |
|      |    | Maximum  | 46   | 9    | 670   | 114  | 3734  | 519  | 17800 | 1214  | 96   | 6   | 487  | 67  | 41    | 8   | 9438   | 227  |

& Analytes: 6-monoacetylmorphine (6-MAM), 6-acetylcodeine (6-AC); MOR: morphine; COD: codeine

#*N*: number of cases; \*Tr: Trace concentration

**Table S3.** Age distribution in the 97 heroin-related deaths examined in Jeddah, Saudi Arabia between 2008–2018.

| Age (year) | Total<br><i>N</i> <sup>#</sup> | Blood with sodium fluoride |      |          |         | Urine |       |          |         | Vitreous humor |      |          |         | Bile  |      |          |         |
|------------|--------------------------------|----------------------------|------|----------|---------|-------|-------|----------|---------|----------------|------|----------|---------|-------|------|----------|---------|
|            |                                | 6-MAM                      | 6-AC | Morphine | Codeine | 6-MAM | 6-AC  | Morphine | Codeine | 6-MAM          | 6-AC | Morphine | Codeine | 6-MAM | 6-AC | Morphine | Codeine |
| 10-20      | 4                              | <i>N</i>                   | 1    | 0        | 4       | 4     | 4     | 3        | 4       | 3              | 2    | 1        | 2       | 2     | 3    | 2        | 3       |
|            |                                | Median                     | 10   | .        | 250     | 25    | 221   | 14       | 1281    | 12             | 31   | 1        | 151     | 17    | 14   | 4        | 2350    |
|            |                                | Minimum                    | 10.0 | .        | 150.0   | 10.0  | 63.0  | 1.0      | 376.7   | 12.0           | 17.0 | 1.0      | 47.0    | 12.0  | 9.0  | 1.0      | 412.0   |
|            |                                | Maximum                    | 10   | .        | 361     | 30    | 482   | 34       | 2301    | 141            | 45   | 1        | 255     | 21    | 41   | 8        | 9438    |
| 21-30      | 32                             | <i>N</i>                   | 15   | 7        | 27      | 27    | 28    | 21       | 28      | 27             | 25   | 13       | 26      | 26    | 7    | 4        | 12      |
|            |                                | Median                     | 7    | 2        | 250     | 19    | 335   | 35       | 1282    | 211            | 18   | 2        | 74      | 17    | 13   | 4        | 4518    |
|            |                                | Minimum                    | .3   | Tr*      | 105.0   | 3.0   | 10.0  | 1.0      | 23.0    | 3.0            | 3.0  | Tr       | 8.0     | 3.0   | 2.0  | 1.3      | 885.0   |
|            |                                | Maximum                    | 266  | 9        | 1927    | 114   | 18876 | 709      | 42264   | 12110          | 91   | 13       | 390     | 124   | 160  | 5        | 41100   |
| 31-40      | 26                             | <i>N</i>                   | 17   | 5        | 23      | 23    | 19    | 12       | 19      | 19             | 22   | 11       | 22      | 21    | 3    | 1        | 6       |
|            |                                | Median                     | 10   | 4        | 255     | 18    | 340   | 56       | 1742    | 178            | 26   | 2        | 66      | 13    | 13   | 5        | 1144    |
|            |                                | Minimum                    | 1.3  | Tr       | 75.0    | 3.0   | 5.0   | 1.2      | 14.0    | 6.0            | 1.3  | Tr       | 8.0     | 3.0   | 1.3  | 5.0      | 40.0    |
|            |                                | Maximum                    | 153  | 11       | 715     | 76    | 1748  | 589      | 11108   | 1303           | 196  | 23       | 487     | 67    | 38   | 5        | 40383   |
| 41-50      | 20                             | <i>N</i>                   | 11   | 5        | 18      | 18    | 13    | 7        | 13      | 11             | 13   | 5        | 13      | 12    | 3    | 0        | 5       |
|            |                                | Median                     | 24   | 2        | 369     | 23    | 701   | 89       | 687     | 200            | 32   | 1        | 109     | 11    | 2    | .        | 494     |
|            |                                | Minimum                    | 1.0  | Tr       | 104.0   | 4.0   | 1.0   | 2.0      | 45.0    | 3.0            | 8.0  | Tr       | 37.0    | 1.4   | 2.0  | .        | 300.0   |
|            |                                | Maximum                    | 160  | 29       | 869     | 67    | 3734  | 340      | 17800   | 605            | 243  | 13       | 302     | 31    | 10   | .        | 2577    |
| 51-70      | 15                             | <i>N</i>                   | 6    | 3        | 12      | 12    | 10    | 7        | 10      | 10             | 8    | 5        | 8       | 8     | 1    | 1        | 2       |
|            |                                | Median                     | 21   | 14       | 302     | 34    | 136   | 33       | 2245    | 187            | 52   | 2        | 137     | 15    | 12   | 1        | 742     |
|            |                                | Minimum                    | 1.0  | 5.0      | 23.0    | 3.0   | 1.0   | 2.0      | 122.0   | 5.0            | 1.0  | Tr       | 11.0    | 2.0   | 12.0 | 1.0      | 133.0   |
|            |                                | Maximum                    | 416  | 19       | 4387    | 140   | 2521  | 249      | 50401   | 2100           | 215  | 8        | 891     | 143   | 12   | 1        | 1350    |

& Analytes: 6-monoacetylmorphine (6-MAM), 6-acetylcodeine (6-AC); MOR: morphine; COD: codeine

<sup>#</sup>N: number of cases; \*Tr: Trace concentration

**Table S4.** Concentrations of heroin biomarkers, morphine, and codeine in the 97 heroin related deaths in the current study according to post-mortem interval time group.

| Post-mortem<br>Intervals (h) | Total <i>N</i> |                       | Blood with sodium fluoride |      |       |      | Urine |      |       |       | Vitreous humor |      |       |      | Bile  |      |        |      |
|------------------------------|----------------|-----------------------|----------------------------|------|-------|------|-------|------|-------|-------|----------------|------|-------|------|-------|------|--------|------|
|                              |                |                       | 6-MAM                      | 6-AC | MOR   | COD  | 6-MAM | 6-AC | MOR   | COD   | 6-MAM          | 6-AC | MOR   | COD  | 6-MAM | 6-AC | MOR    | COD  |
| <24                          | 49             | <i>N</i> <sup>#</sup> | 32                         | 20   | 44    | 44   | 37    | 26   | 37    | 33    | 44             | 24   | 44    | 43   | 7     | 4    | 14     | 12   |
|                              |                | Median                | 16                         | 3    | 255   | 21   | 324   | 35   | 1963  | 207   | 22             | 3    | 70    | 14   | 12    | 4    | 3366   | 35   |
|                              |                | Minimum               | Tr*                        | Tr   | 23.0  | 3.0  | 1.0   | 1.0  | 14.0  | 3.0   | 3.0            | Tr   | 8.0   | 1.4  | 2.0   | 1.3  | 133.0  | 6.0  |
|                              |                | Maximum               | 416                        | 29   | 4387  | 140  | 18876 | 709  | 42264 | 12110 | 243            | 23   | 891   | 143  | 41    | 8    | 41100  | 227  |
| 25-48 h                      | 18             | <i>N</i>              | 7                          | 0    | 16    | 16   | 16    | 12   | 16    | 16    | 14             | 7    | 14    | 13   | 6     | 2    | 6      | 6    |
|                              |                | Median                | 6                          |      | 314   | 22   | 403   | 35   | 2200  | 154   | 19             | 1    | 121   | 11   | 14    | 3    | 1430   | 31   |
|                              |                | Minimum               | 1.3                        |      | 105.0 | 4.0  | 1.0   | 1.2  | 122.0 | 5.0   | 1.0            | Tr   | 11.0  | 2.0  | 1.3   | 1.0  | 121.0  | 6.5  |
|                              |                | Maximum               | 10                         |      | 725   | 114  | 2391  | 134  | 50401 | 1593  | 215            | 8    | 545   | 76   | 160   | 5    | 5980   | 67   |
| 49-72 h                      | 10             | <i>N</i>              | 5                          | 0    | 9     | 9    | 9     | 3    | 9     | 9     | 6              | 2    | 6     | 6    | 0     | 0    | 1      | 1    |
|                              |                | Median                | 5                          |      | 277   | 24   | 67    | 135  | 584   | 38    | 37             | 8    | 93    | 22   |       |      | 9808   | 79   |
|                              |                | Minimum               | 2.0                        |      | 108.0 | 7.0  | 1.3   | 12.7 | 102.0 | 12.0  | 14.0           | 2.0  | 17.0  | 3.0  |       |      | 9808.0 | 79.0 |
|                              |                | Maximum               | 21                         |      | 429   | 76   | 3390  | 641  | 12247 | 904   | 91             | 13   | 254   | 124  |       |      | 9808   | 79   |
| 73-120                       | 8              | <i>N</i>              | 3                          | 0    | 5     | 5    | 3     | 3    | 3     | 3     | 2              | 0    | 2     | 2    | 1     | 0    | 1      | 1    |
|                              |                | Median                | 1                          |      | 370   | 45   | 851   | 56   | 5351  | 532   | 50             |      | 266   | 15   | 2     |      | 2577   | 13   |
|                              |                | Minimum               | 1.0                        |      | 121.0 | 11.0 | 138.0 | 3.0  | 931.0 | 39.0  | 30.0           |      | 142.0 | 11.0 | 2.0   |      | 2577.0 | 13.0 |
|                              |                | Maximum               | 12                         |      | 514   | 67   | 2521  | 249  | 6933  | 1214  | 70             |      | 390   | 18   | 2     |      | 2577   | 13   |
| >120                         | 12             | <i>N</i>              | 3                          | 0    | 10    | 10   | 9     | 6    | 9     | 9     | 4              | 2    | 5     | 5    | 3     | 2    | 6      | 5    |
|                              |                | Median                | 10                         |      | 346   | 23   | 520   | 51   | 704   | 72    | 25             | 8    | 160   | 8    | 9     | 3    | 876    | 37   |
|                              |                | Minimum               | 3.0                        |      | 190.0 | 4.0  | 58.0  | 1.0  | 376.7 | 12.0  | 22.0           | 1.0  | 42.0  | 3.0  | 2.0   | .9   | 40.0   | 5.0  |
|                              |                | Maximum               | 17                         |      | 869   | 46   | 1584  | 201  | 4114  | 2100  | 41             | 14   | 302   | 14   | 13    | 5    | 40383  | 189  |

& Analytes: 6-monoacetylmorphine (6-MAM), 6-acetylcodeine (6-AC); MOR: morphine; COD: codeine

<sup>#</sup>*N*: number of cases; \*Tr: Trace concentration

**Table S5.** Comparison between heroin related metabolites concentrations in different bodily fluids according to the presence of injection marks at autopsy, presence of heroin materials in the scene and whether the last moment before death had been witnessed or they died alone in 97 hero-in-related deaths in the current study.

|                            |              |          |         | Blood with sodium fluoride |      |       |     | Urine |      |       |       | Vitreous humor |      |      |     | Bile  |      |        |      |
|----------------------------|--------------|----------|---------|----------------------------|------|-------|-----|-------|------|-------|-------|----------------|------|------|-----|-------|------|--------|------|
|                            |              | Total N# |         | 6-MAM                      | 6-AC | MOR   | COD | 6-MAM | 6-AC | MOR   | COD   | 6-MAM          | 6-AC | MOR  | COD | 6-MAM | 6-AC | MOR    | COD  |
| Injection Marks            | No           | 30       | N       | 14                         | 6    | 24    | 24  | 27    | 18   | 27    | 26    | 20             | 11   | 21   | 19  | 11    | 6    | 15     | 13   |
|                            |              |          | Median  | 7                          | 1    | 215   | 13  | 283   | 14   | 704   | 107   | 23             | 2    | 121  | 9   | 13    | 4    | 2151   | 37   |
|                            |              |          | Minimum | Tr*                        | Tr   | 75.0  | 3.0 | 1.3   | .7   | 45.0  | 3.0   | 1.3            | .2   | 13.0 | 1.4 | 1.3   | .9   | 40.0   | 6.0  |
|                            |              |          | Maximum | 23                         | 3    | 715   | 79  | 4557  | 709  | 20424 | 1130  | 125            | 23   | 302  | 29  | 160   | 5    | 41081  | 189  |
|                            | Yes          | 67       | N       | 36                         | 14   | 60    | 60  | 47    | 32   | 47    | 44    | 50             | 24   | 50   | 50  | 6     | 2    | 13     | 12   |
|                            |              |          | Median  | 13                         | 5    | 290   | 28  | 471   | 42   | 2185  | 208   | 26             | 2    | 71   | 14  | 11    | 4    | 1829   | 27   |
|                            |              |          | Minimum | 1.0                        | Tr   | 23.0  | 3.0 | 1.0   | 1.0  | 14.0  | 5.0   | 1.0            | Tr   | 8.0  | 2.0 | 2.0   | 1.0  | 133.0  | 5.0  |
|                            |              |          | Maximum | 416                        | 29   | 4387  | 140 | 18876 | 670  | 50401 | 12110 | 243            | 15   | 891  | 143 | 41    | 8    | 41100  | 227  |
| Heroin powder presence     | No           | 80       | N       | 44                         | 19   | 72    | 72  | 61    | 42   | 61    | 57    | 58             | 29   | 59   | 58  | 15    | 8    | 25     | 23   |
|                            |              |          | Median  | 10                         | 3    | 278   | 21  | 324   | 36   | 1238  | 166   | 26             | 2    | 75   | 13  | 12    | 4    | 1715   | 37   |
|                            |              |          | Minimum | Tr                         | Tr   | 23.0  | 3.0 | 1.0   | 1.0  | 14.0  | 3.0   | 1.0            | Tr   | 8.0  | 1.4 | 1.3   | .5   | 40.0   | 5.0  |
|                            |              |          | Maximum | 416                        | 29   | 4387  | 140 | 4557  | 709  | 20424 | 2100  | 243            | 23   | 891  | 143 | 160   | 8    | 41100  | 227  |
|                            | Yes          | 17       | N       | 6                          | 1    | 12    | 12  | 13    | 8    | 13    | 13    | 12             | 6    | 12   | 11  | 2     | 0    | 3      | 2    |
|                            |              |          | Median  | 12                         | 4    | 337   | 31  | 378   | 38   | 2788  | 220   | 18             | 1    | 155  | 17  | 13    |      | 2831   | 18   |
|                            |              |          | Minimum | 1.2                        | 4.0  | 104.0 | 4.0 | 14.0  | 3.0  | 102.0 | 23.0  | 10.0           | .3   | 8.0  | 5.0 | 12.0  |      | 2350.0 | 12.0 |
|                            |              |          | Maximum | 266                        | 4    | 1927  | 76  | 18876 | 670  | 50401 | 12110 | 215            | 3    | 545  | 27  | 14    |      | 7800   | 24   |
| Final moments before death | Witnesses    | 34       | N       | 24                         | 10   | 32    | 32  | 26    | 19   | 26    | 25    | 27             | 16   | 28   | 28  | 10    | 5    | 13     | 10   |
|                            |              |          | Median  | 7                          | 4    | 270   | 21  | 335   | 35   | 1644  | 143   | 25             | 3    | 72   | 14  | 13    | 1    | 1715   | 31   |
|                            |              |          | Minimum | Tr                         | Tr   | 105.0 | 4.0 | 5.0   | 1.2  | 14.0  | 7.0   | 1.3            | Tr   | 8.0  | 3.0 | 1.3   | .5   | 40.0   | 6.0  |
|                            |              |          | Maximum | 416                        | 14   | 4387  | 140 | 18876 | 709  | 42264 | 12110 | 196            | 15   | 891  | 143 | 160   | 5    | 7800   | 120  |
|                            | No witnesses | 63       | N       | 26                         | 10   | 52    | 52  | 48    | 31   | 48    | 45    | 43             | 19   | 43   | 41  | 7     | 3    | 15     | 15   |
|                            |              |          | Median  | 12                         | 2    | 302   | 22  | 332   | 39   | 1404  | 208   | 24             | 1    | 92   | 13  | 10    | 5    | 2151   | 36   |
|                            |              |          | Minimum | 1.0                        | Tr   | 23.0  | 3.0 | 1.0   | 1.0  | 45.0  | 3.0   | 1.0            | .2   | 11.0 | 1.4 | 2.0   | 4.0  | 133.0  | 5.0  |
|                            |              |          | Maximum | 251                        | 29   | 869   | 114 | 3734  | 641  | 50401 | 2100  | 243            | 23   | 545  | 124 | 41    | 8    | 41100  | 227  |

& Analytes: 6-monoacetyl morphine (6-MAM), 6-acetylcodeine (6-AC); MOR: morphine; COD: codeine  
N: number of cases; Tr: Trace concentration



**Table S6.** Seasonal variation on the concentrations of heroin biomarkers, morphine, and codeine in the 97 heroin-related deaths in the current study.

| Months    | Total N <sup>#</sup> | Analytes <sup>&amp;</sup> | 6-MAM | 6-AC | MOR   | COD  | 6-MAM | 6-AC | MOR   | COD   | 6-MAM | 6-AC | MOR  | COD | 6-MAM | 6-AC | MOR    | COD  |
|-----------|----------------------|---------------------------|-------|------|-------|------|-------|------|-------|-------|-------|------|------|-----|-------|------|--------|------|
| January   | 10                   | <i>N</i>                  | 5     | 2    | 9     | 9    | 10    | 8    | 10    | 9     | 7     | 2    | 7    | 7   | 3     | 2    | 3      | 3    |
|           |                      | Median                    | 6     | 5    | 365   | 24   | 559   | 36   | 2316  | 284   | 22    | 3    | 68   | 14  | 9     | 5    | 2151   | 36   |
|           |                      | Minimum                   | 2.0   | 1.0  | 122.0 | 3.0  | 18.0  | 1.0  | 23.0  | 3.0   | 5.0   | Tr*  | 10.0 | 3.0 | 2.0   | 4.0  | 488.0  | 13.0 |
|           |                      | Maximum                   | 41    | 9    | 683   | 114  | 2778  | 162  | 5844  | 904   | 140   | 5    | 244  | 76  | 13    | 5    | 4468   | 66   |
| February  | 10                   | <i>N</i>                  | 5     | 3    | 8     | 8    | 8     | 6    | 8     | 8     | 8     | 5    | 8    | 8   | 4     | 3    | 6      | 6    |
|           |                      | Median                    | 4     | 2    | 300   | 22   | 235   | 19   | 847   | 116   | 22    | 3    | 106  | 13  | 14    | 3    | 4235   | 87   |
|           |                      | Minimum                   | Tr    | Tr   | 75.0  | 3.0  | 14.0  | 2.0  | 102.0 | 12.0  | 3.4   | .4   | 13.0 | 3.0 | 2.0   | 1.3  | 885.0  | 6.0  |
|           |                      | Maximum                   | 21    | 3    | 429   | 42   | 2582  | 87   | 6338  | 2100  | 125   | 23   | 270  | 27  | 19    | 5    | 41100  | 165  |
| March     | 10                   | <i>N</i>                  | 6     | 3    | 9     | 9    | 5     | 3    | 5     | 5     | 8     | 5    | 8    | 8   | 2     | 0    | 4      | 3    |
|           |                      | Median                    | 17    | 11   | 271   | 28   | 378   | 34   | 1457  | 141   | 36    | 1    | 98   | 22  | 87    | .    | 2033   | 7    |
|           |                      | Minimum                   | 6.0   | 1.6  | 119.0 | 4.0  | 58.0  | 12.0 | 86.0  | 7.0   | 19.0  | Tr   | 8.0  | 4.0 | 14.0  | .    | 1264.0 | 5.0  |
|           |                      | Maximum                   | 416   | 14   | 4387  | 140  | 4557  | 709  | 20424 | 972   | 196   | 8    | 255  | 30  | 160   | .    | 5980   | 24   |
| April     | 11                   | <i>N</i>                  | 6     | 4    | 9     | 9    | 7     | 5    | 7     | 7     | 8     | 5    | 8    | 8   | 2     | 0    | 3      | 3    |
|           |                      | Median                    | 79    | 5    | 449   | 24   | 42    | 2    | 244   | 71    | 14    | 3    | 42   | 12  | 6     | .    | 494    | 23   |
|           |                      | Minimum                   | 1.3   | 3.5  | 121.0 | 7.0  | 1.0   | 1.0  | 96.0  | 5.0   | 1.0   | 1.0  | 11.0 | 2.0 | 1.3   | .    | 121.0  | 7.0  |
|           |                      | Maximum                   | 266   | 29   | 1927  | 63   | 18876 | 670  | 42264 | 12110 | 243   | 8    | 167  | 72  | 10    | .    | 40383  | 189  |
| May       | 8                    | <i>N</i>                  | 4     | 1    | 6     | 6    | 5     | 2    | 5     | 5     | 7     | 3    | 7    | 7   | 1     | 1    | 3      | 2    |
|           |                      | Median                    | 6     | 2    | 232   | 16   | 48    | 39   | 2098  | 166   | 30    | 1    | 92   | 8   | 12    | 1    | 1350   | 50   |
|           |                      | Minimum                   | 1.0   | 2.0  | 121.0 | 4.0  | 1.0   | 8.0  | 76.0  | 5.0   | 13.0  | 1.0  | 8.0  | 3.0 | 12.0  | 1.0  | 300.0  | 33.0 |
|           |                      | Maximum                   | 24    | 2    | 370   | 67   | 822   | 69   | 11700 | 660   | 89    | 8    | 150  | 31  | 12    | 1    | 2831   | 67   |
| June      | 8                    | <i>N</i>                  | 4     | 1    | 8     | 8    | 6     | 6    | 6     | 6     | 6     | 4    | 6    | 6   | 0     | 0    | 0      | 0    |
|           |                      | Median                    | 4     | 0    | 255   | 23   | 124   | 10   | 1574  | 123   | 9     | 1    | 126  | 12  |       |      |        |      |
|           |                      | Minimum                   | 1.0   | Tr   | 23.0  | 3.0  | 24.0  | 2.0  | 45.0  | 3.0   | 6.0   | Tr   | 17.0 | 1.4 |       |      |        |      |
|           |                      | Maximum                   | 12    | 0    | 725   | 54   | 2391  | 320  | 50401 | 1593  | 215   | 1    | 545  | 21  |       |      |        |      |
| July      | 12                   | <i>N</i>                  | 6     | 2    | 9     | 9    | 9     | 5    | 9     | 8     | 7     | 3    | 8    | 6   | 2     | 0    | 3      | 3    |
|           |                      | Median                    | 14    | 10   | 190   | 20   | 324   | 33   | 3195  | 257   | 14    | 2    | 62   | 16  | 7     | .    | 2577   | 13   |
|           |                      | Minimum                   | 1.2   | Tr   | 104.0 | 5.0  | 20.0  | 1.0  | 242.0 | 12.0  | 10.0  | 1.0  | 32.0 | 9.0 | 2.0   | .    | 133.0  | 12.0 |
|           |                      | Maximum                   | 251   | 19   | 313   | 40   | 1748  | 589  | 11108 | 634   | 79    | 15   | 184  | 18  | 12    | .    | 7800   | 14   |
| August    | 7                    | <i>N</i>                  | 2     | 2    | 5     | 5    | 7     | 4    | 7     | 7     | 3     | 3    | 3    | 3   | 1     | 1    | 2      | 1    |
|           |                      | Median                    | 56    | 3    | 319   | 30   | 340   | 147  | 1337  | 200   | 41    | 13   | 201  | 9   | 9     | 1    | 226    | 37   |
|           |                      | Minimum                   | 8.0   | 1.0  | 240.0 | 13.0 | 1.3   | 56.0 | 184.0 | 12.0  | 6.0   | 1.0  | 38.0 | 8.0 | 9.0   | 1.0  | 40.0   | 37.0 |
|           |                      | Maximum                   | 104   | 5    | 478   | 35   | 2521  | 249  | 5351  | 1214  | 212   | 14   | 260  | 21  | 9     | 1    | 412    | 37   |
| September | 7                    | <i>N</i>                  | 2     | 0    | 7     | 7    | 6     | 5    | 6     | 6     | 5     | 1    | 6    | 6   | 0     | 0    | 1      | 1    |
|           |                      | Median                    | 6     |      | 250   | 11   | 939   | 89   | 1030  | 201   | 25    | 2    | 68   | 13  |       |      | 1829   | 31   |

|          |   |         |      |     |       |      |       |      |        |       |      |     |       |      |      |        |        |
|----------|---|---------|------|-----|-------|------|-------|------|--------|-------|------|-----|-------|------|------|--------|--------|
| October  | 3 | Minimum | 4.3  |     | 121.0 | 8.0  | 5.0   | 39.0 | 14.0   | 8.0   | 14.0 | 2.0 | 17.0  | 5.0  |      | 1829.0 | 31.0   |
|          |   | Maximum | 7    |     | 360   | 54   | 3390  | 641  | 12247  | 903   | 71   | 2   | 487   | 67   |      | 1829   | 31     |
|          |   | N       | 2    | 1   | 3     | 3    | 3     | 2    | 3      | 2     | 2    | 1   | 1     | 1    | 0    | 0      | 0      |
|          |   | Median  | 27   | 1   | 474   | 76   | 2708  | 192  | 15953  | 675   | 61   | 2   | 190   | 9    |      |        |        |
| November | 4 | Minimum | 8.0  | 1.3 | 340.0 | 41.0 | 238.0 | 43.0 | 2788.0 | 220.0 | 25.0 | 2.3 | 190.0 | 9.0  |      |        |        |
|          |   | Maximum | 46   | 1   | 647   | 79   | 3734  | 340  | 17800  | 1130  | 96   | 2   | 190   | 9    |      |        |        |
|          |   | N       | 2    | 0   | 4     | 4    | 3     | 1    | 3      | 3     | 3    | 0   | 3     | 3    | 1    | 0      | 1      |
|          |   | Median  | 27   |     | 453   | 21   | 1434  | 13   | 848    | 51    | 70   |     | 102   | 18   | 38   | .      | 459    |
| December | 7 | Minimum | 12.0 |     | 167.0 | 4.0  | 65.0  | 13.0 | 720.0  | 6.0   | 26.0 |     | 68.0  | 11.0 | 38.0 | .      | 459.0  |
|          |   | Maximum | 41   |     | 683   | 47   | 2778  | 13   | 3836   | 300   | 140  |     | 390   | 27   | 38   | .      | 459    |
|          |   | N       | 6    | 1   | 7     | 7    | 5     | 3    | 5      | 4     | 6    | 3   | 6     | 6    | 1    | 1      | 2      |
|          |   | Median  | 8    | 5   | 160   | 18   | 426   | 14   | 1023   | 78    | 53   | 4   | 187   | 32   | 41   | 8      | 9623   |
|          |   | Minimum | 3.0  | 5.0 | 105.0 | 10.0 | 10.0  | 12.0 | 104.0  | 12.0  | 16.0 | 1.8 | 37.0  | 5.0  | 41.0 | 8.0    | 9438.0 |
|          |   | Maximum | 35   | 5   | 827   | 76   | 943   | 39   | 9279   | 602   | 133  | 13  | 891   | 143  | 41   | 8      | 9808   |

& Analytes: 6-monoacetylmorphine (6-MAM), 6-acetylcodeine (6-AC); MOR: morphine; COD: codeine

#N: number of cases; \*Tr: Trace concentration

**Table S7.** Correlation between the heroin biomarkers, morphine, and codeine concentrations in the 97 heroin-related death in the current study.

|                            | Analytes & |                 | Blood with Sodium Fluoride |        |        |        | Urine  |        |        |        | Vitreous Humor |        |        |        | Bile  |          |       |       |
|----------------------------|------------|-----------------|----------------------------|--------|--------|--------|--------|--------|--------|--------|----------------|--------|--------|--------|-------|----------|-------|-------|
|                            |            |                 | 6-MAM                      | 6-AC   | MOR    | COD    | 6-MAM  | 6-AC   | MOR    | COD    | 6-MAM          | 6-AC   | MOR    | COD    | 6-MAM | 6-AC     | MOR   | COD   |
| Blood with Sodium Fluoride | 6-MAM      | Rs              | 1.000                      | .699** | .510** | .336*  | .333*  | .435*  | .204   | .131   | .532**         | -.016  | -.064  | .243   | -.072 | .211     | -.389 | -.095 |
|                            |            | Sig. (2-tailed) | .                          | <.001  | <.001  | .017   | .041   | .034   | .220   | .454   | <.001          | .940   | .697   | .141   | .854  | .789     | .169  | .747  |
|                            |            | Number of cases | 50                         | 20     | 50     | 50     | 38     | 24     | 38     | 35     | 40             | 24     | 39     | 38     | 9     | 4        | 14    | 14    |
|                            | 6-AC       | Rs              | .699**                     | 1.000  | .179   | .222   | -.150  | .182   | -.085  | .052   | .539*          | .537*  | -.107  | .399   | .000  | -1.000   | -.600 | -.143 |
|                            |            | Sig. (2-tailed) | <.001                      | .      | .450   | .348   | .579   | .553   | .753   | .854   | .021           | .026   | .671   | .101   | 1.000 | .        | .208  | .787  |
|                            |            | Number of cases | 20                         | 20     | 20     | 20     | 16     | 13     | 16     | 15     | 18             | 17     | 18     | 18     | 4     | 2        | 6     | 6     |
|                            | MOR        | Rs              | .510**                     | .179   | 1.000  | .631** | .285*  | .213   | .269*  | .262*  | .428**         | -.243  | .295*  | .038   | -.076 | -.643    | -.315 | -.183 |
|                            |            | Sig. (2-tailed) | <.001                      | .450   | .      | <.001  | .023   | .166   | .031   | .043   | <.001          | .172   | .018   | .768   | .779  | .086     | .133  | .415  |
|                            |            | Number of cases | 50                         | 20     | 84     | 84     | 64     | 44     | 64     | 60     | 63             | 33     | 64     | 63     | 16    | 8        | 24    | 22    |
|                            | COD        | Rs              | .336*                      | .222   | .631** | 1.000  | .274*  | .383*  | .301*  | .387** | .426**         | .000   | .190   | .258*  | .218  | -.217    | .164  | .001  |
|                            |            | Sig. (2-tailed) | .017                       | .348   | <.001  | .      | .028   | .010   | .016   | .002   | <.001          | 1.000  | .132   | .041   | .416  | .606     | .444  | .997  |
|                            |            | Number of cases | 50                         | 20     | 84     | 84     | 64     | 44     | 64     | 60     | 63             | 33     | 64     | 63     | 16    | 8        | 24    | 22    |
| Urine                      | 6-MAM      | Rs              | .333*                      | -.150  | .285*  | .274*  | 1.000  | .782** | .651** | .591** | .398**         | .164   | .180   | .001   | .359  | .214     | .138  | .377  |
|                            |            | Sig. (2-tailed) | .041                       | .579   | .023   | .028   | .      | <.001  | <.001  | <.001  | .002           | .394   | .185   | .993   | .189  | .610     | .519  | .092  |
|                            |            | Number of cases | 38                         | 16     | 64     | 64     | 74     | 50     | 74     | 70     | 56             | 29     | 56     | 54     | 15    | 8        | 24    | 21    |
|                            | 6-AC       | Rs              | .435*                      | .182   | .213   | .383*  | .782** | 1.000  | .488** | .446** | .401*          | .448*  | -.004  | .020   | .087  | .000     | -.141 | .158  |
|                            |            | Sig. (2-tailed) | .034                       | .553   | .166   | .010   | <.001  | .      | <.001  | .002   | .014           | .032   | .980   | .907   | .800  | 1.000    | .602  | .589  |
|                            |            | Number of cases | 24                         | 13     | 44     | 44     | 50     | 50     | 50     | 47     | 37             | 23     | 37     | 37     | 11    | 7        | 16    | 14    |
|                            | MOR        | Rs              | .204                       | -.085  | .269*  | .301*  | .651** | .488** | 1.000  | .838** | .171           | -.156  | .150   | .033   | .461  | .452     | .317  | .128  |
|                            |            | Sig. (2-tailed) | .220                       | .753   | .031   | .016   | <.001  | <.001  | .      | <.001  | .209           | .420   | .271   | .810   | .084  | .260     | .132  | .580  |
|                            |            | Number of cases | 38                         | 16     | 64     | 64     | 74     | 50     | 74     | 70     | 56             | 29     | 56     | 54     | 15    | 8        | 24    | 21    |
|                            | COD        | Rs              | .131                       | .052   | .262*  | .387** | .591** | .446** | .838** | 1.000  | .118           | -.063  | .076   | -.044  | .252  | .036     | .231  | .023  |
|                            |            | Sig. (2-tailed) | .454                       | .854   | .043   | .002   | <.001  | .002   | <.001  | .      | .404           | .749   | .587   | .759   | .384  | .939     | .290  | .922  |
|                            |            | Number of cases | 35                         | 15     | 60     | 60     | 70     | 47     | 70     | 70     | 52             | 28     | 53     | 52     | 14    | 7        | 23    | 20    |
| Vitreous Humor             | 6-MAM      | Rs              | .532**                     | .539*  | .428** | .426** | .398** | .401*  | .171   | .118   | 1.000          | .509** | .346** | .371** | .343  | -.714    | -.071 | -.058 |
|                            |            | Sig. (2-tailed) | <.001                      | .021   | <.001  | <.001  | .002   | .014   | .209   | .404   | .              | .002   | .004   | .002   | .231  | .071     | .760  | .820  |
|                            |            | Number of cases | 40                         | 18     | 63     | 63     | 56     | 37     | 56     | 52     | 70             | 35     | 69     | 67     | 14    | 7        | 21    | 18    |
|                            | 6-AC       | Rs              | -.016                      | .537*  | -.243  | .000   | .164   | .448*  | -.156  | -.063  | .509**         | 1.000  | -.116  | .136   | -.265 | -1.000** | -.084 | .434  |
|                            |            | Sig. (2-tailed) | .940                       | .026   | .172   | 1.000  | .394   | .032   | .420   | .749   | .002           | .      | .505   | .435   | .612  | .        | .830  | .283  |
|                            |            | Number of cases | 24                         | 17     | 33     | 33     | 29     | 23     | 29     | 28     | 35             | 35     | 35     | 35     | 6     | 3        | 9     | 8     |
|                            | MOR        | Rs              | -.064                      | -.107  | .295*  | .190   | .180   | -.004  | .150   | .076   | .346**         | -.116  | 1.000  | .369** | .075  | -.714    | .155  | .170  |
|                            |            | Sig. (2-tailed) | .697                       | .671   | .018   | .132   | .185   | .980   | .271   | .587   | .004           | .505   | .      | .002   | .799  | .071     | .502  | .499  |
|                            |            | Number of cases | 39                         | 18     | 64     | 64     | 56     | 37     | 56     | 53     | 69             | 35     | 71     | 69     | 14    | 7        | 21    | 18    |
|                            | COD        | Rs              | .243                       | .399   | .038   | .258*  | .001   | .020   | .033   | -.044  | .371**         | .136   | .369** | 1.000  | .351  | -.346    | .288  | -.080 |

|      |       |                 |       |          |       |       |      |       |      |      |       |          |       |       |       |       |        |        |
|------|-------|-----------------|-------|----------|-------|-------|------|-------|------|------|-------|----------|-------|-------|-------|-------|--------|--------|
|      |       | Sig. (2-tailed) | .141  | .101     | .768  | .041  | .993 | .907  | .810 | .759 | .002  | .435     | .002  | .     | .218  | .448  | .205   | .753   |
|      |       | Number of cases | 38    | 18       | 63    | 63    | 54   | 37    | 54   | 52   | 67    | 35       | 69    | 69    | 14    | 7     | 21     | 18     |
| Bile | 6-MAM | Rs              | -.072 | .000     | -.076 | .218  | .359 | .087  | .461 | .252 | .343  | -.265    | .075  | .351  | 1.000 | .566  | .509*  | .495*  |
|      |       | Sig. (2-tailed) | .854  | 1.000    | .779  | .416  | .189 | .800  | .084 | .384 | .231  | .612     | .799  | .218  | .     | .143  | .037   | .043   |
|      |       | Number of cases | 9     | 4        | 16    | 16    | 15   | 11    | 15   | 14   | 14    | 6        | 14    | 14    | 17    | 8     | 17     | 17     |
|      | 6-AC  | Rs              | .211  | -1.000** | -.643 | -.217 | .214 | .000  | .452 | .036 | -.714 | -1.000** | -.714 | -.346 | .566  | 1.000 | .571   | .119   |
|      |       | Sig. (2-tailed) | .789  | .        | .086  | .606  | .610 | 1.000 | .260 | .939 | .071  | .        | .071  | .448  | .143  | .     | .139   | .779   |
|      |       | Number of cases | 4     | 2        | 8     | 8     | 8    | 7     | 8    | 7    | 7     | 3        | 7     | 7     | 8     | 8     | 8      | 8      |
|      | MOR   | Rs              | -.389 | -.600    | -.315 | .164  | .138 | -.141 | .317 | .231 | -.071 | -.084    | .155  | .288  | .509* | .571  | 1.000  | .537** |
|      |       | Sig. (2-tailed) | .169  | .208     | .133  | .444  | .519 | .602  | .132 | .290 | .760  | .830     | .502  | .205  | .037  | .139  | .      | .006   |
|      |       | Number of cases | 14    | 6        | 24    | 24    | 24   | 16    | 24   | 23   | 21    | 9        | 21    | 21    | 17    | 8     | 28     | 25     |
|      | COD   | Rs              | -.095 | -.143    | -.183 | .001  | .377 | .158  | .128 | .023 | -.058 | .434     | .170  | -.080 | .495* | .119  | .537** | 1.000  |
|      |       | Sig. (2-tailed) | .747  | .787     | .415  | .997  | .092 | .589  | .580 | .922 | .820  | .283     | .499  | .753  | .043  | .779  | .006   | .      |
|      |       | Number of cases | 14    | 6        | 22    | 22    | 21   | 14    | 21   | 20   | 18    | 8        | 18    | 18    | 17    | 8     | 25     | 25     |

\* Analytes: 6-monoacetylmorphine (6-MAM), 6-acetylcodeine (6-AC); MOR: morphine; COD; # Rs. Correlation Coefficient.; \*\*, Correlation is significant at the 0.01 level (2-tailed); \*, Correlation is significant at the 0.05 level (2-tailed).

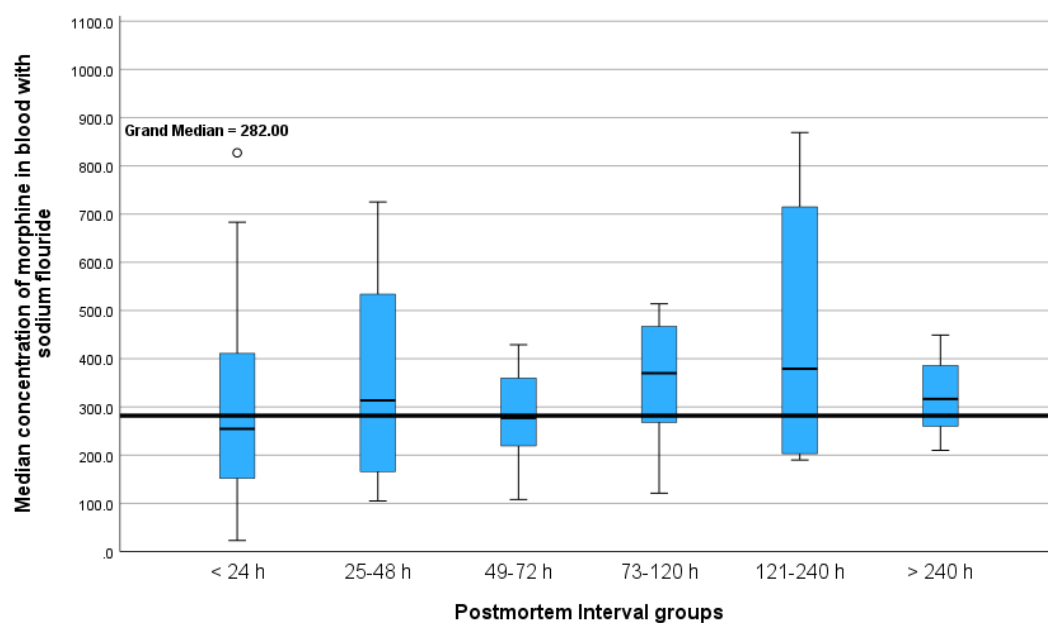

**Figure S1.** Variation of morphine concentration group in the blood with sodium fluoride (ng/mL) in the 97 heroin-related fatality cases in relation to postmortem interval time

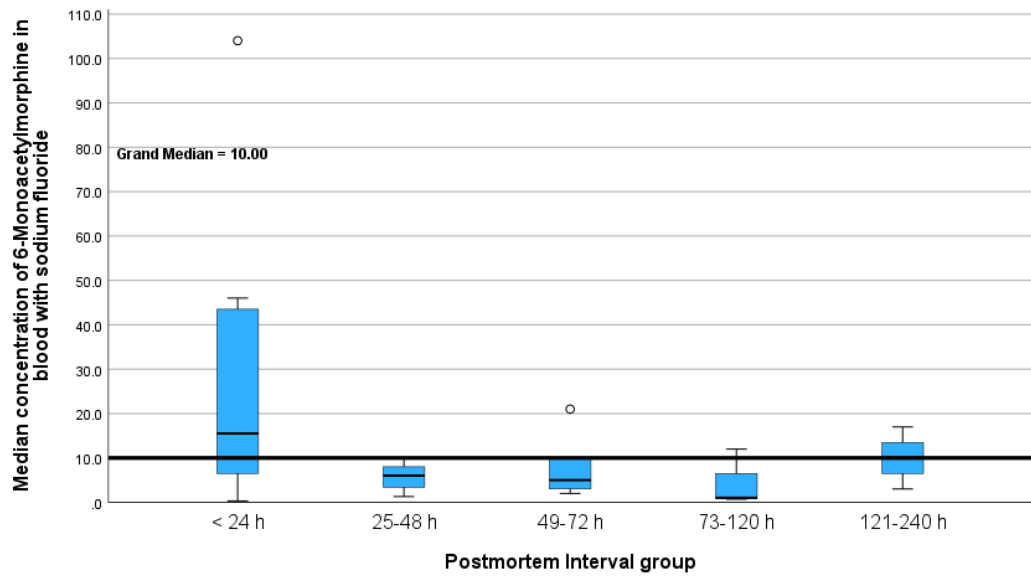

(a)

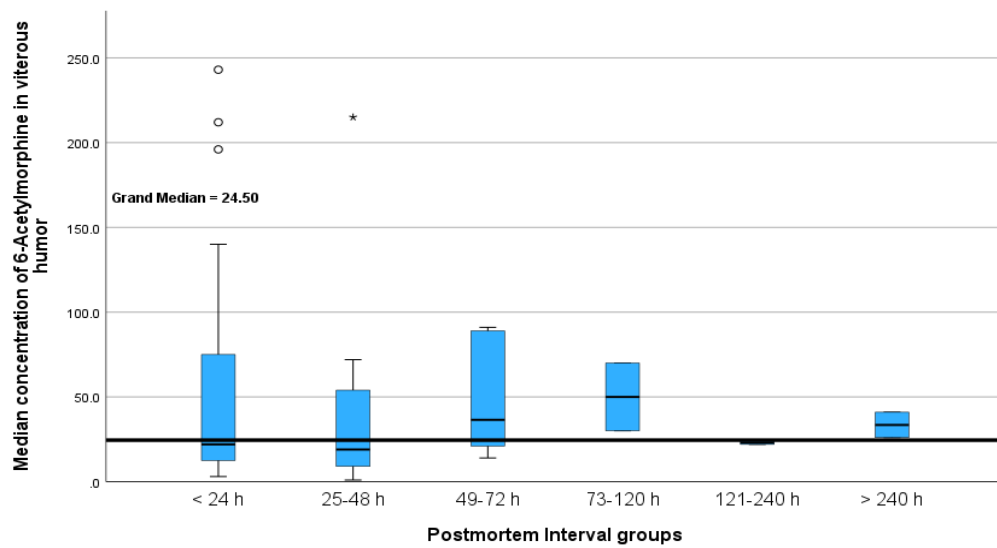

(b)

Figure S2. Comparison between the median 6-monoacetylmorphine (ng/mL) in (a) blood with sodium fluoride and (b) vitreous humor samples in heroin-related deaths in the current study in relation to postmortem interval time.

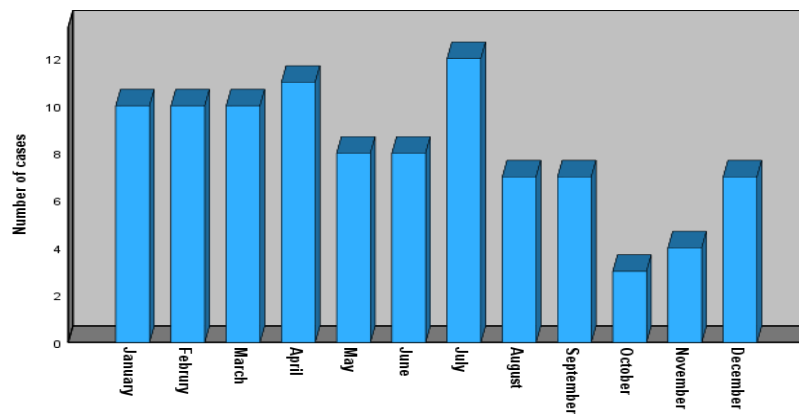

Figure S3 Distribution of heroin-related deaths in Jeddah, Saudi Arabia between 2008–2018 (by month).
